# Supplementary material for: Long-life Na–O2 batteries with high energy efficiency enabled by electrochemically splitting NaO2 at a low overpotential
Source: Royal Society of Chemistry journal article supplement (doi:10.1039/c4cp01961j), 2014-01-01
Supplement: c4cp01961j1.pdf [file c4cp01961j1.pdf]

## Supporting Information

### Long-Life Na-O<sub>2</sub> Batteries with High Energy Efficiency Enabled by Electrochemically Splitting NaO<sub>2</sub> at Low Overpotential

Ning Zhao,<sup>ab</sup> Chilin Li,<sup>\*a</sup> and Xiangxin Guo<sup>\*a</sup>

<sup>a</sup> State Key Laboratory of High Performance Ceramics and Superfine Microstructure, Shanghai Institute of Ceramics, Chinese Academy of Sciences, Shanghai 200050, China

<sup>b</sup> Graduate School of Chinese Academy of Sciences, Beijing, 100039, China

\*E-mail: [chilinli@mail.sic.ac.cn](mailto:chilinli@mail.sic.ac.cn), [xxguo@mail.sic.ac.cn](mailto:xxguo@mail.sic.ac.cn)

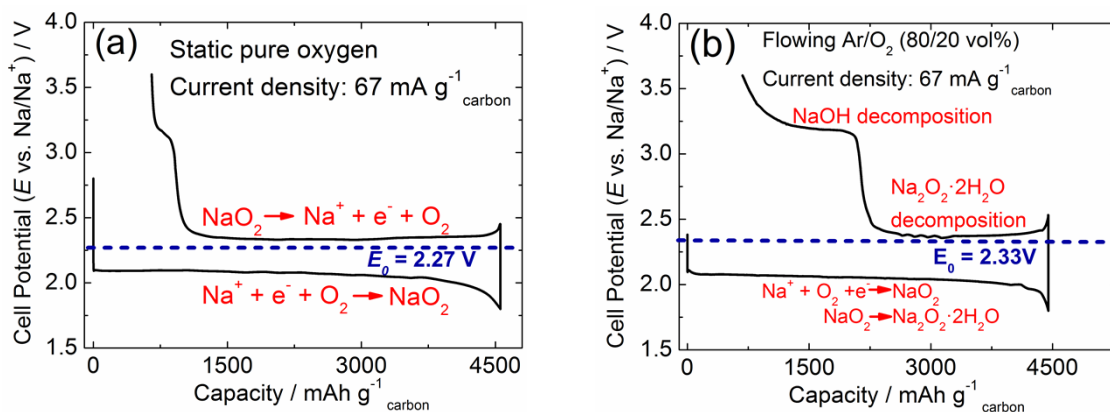

**Figure S1.** The typical discharge and charge curves of Na-O<sub>2</sub> batteries operated under (a) the static pure O<sub>2</sub> atmosphere and (b) the flowing Ar/O<sub>2</sub> (80/20 vol%) atmosphere. The batteries were tested at a current density of 67 mA g<sup>-1</sup> carbon (~0.1 mA cm<sup>-2</sup>) within a voltage range of 1.8-3.6 V. The specific capacity is calculated based on the mass of carbon in the VACNT cathodes. E<sub>0</sub> = 2.27 V denotes the thermodynamic potential based on the reaction of Na<sup>+</sup> + e<sup>-</sup> + O<sub>2</sub> → NaO<sub>2</sub>. E<sub>0</sub> = 2.33 V denotes the thermodynamic potential based on the reaction of 2Na<sup>+</sup> + 2e<sup>-</sup> + O<sub>2</sub> → Na<sub>2</sub>O<sub>2</sub>. The reaction formulae are given according to the distinctive discharge/charge plateau potentials in combination with the phase analysis by XRD. Note that NaO<sub>2</sub> is the main discharge solid product in the static atmosphere, whereas it is Na<sub>2</sub>O<sub>2</sub>·2H<sub>2</sub>O in the flowing atmosphere. It indicates that the discharge products and recharge curve profiles greatly depend on the working atmospheres.

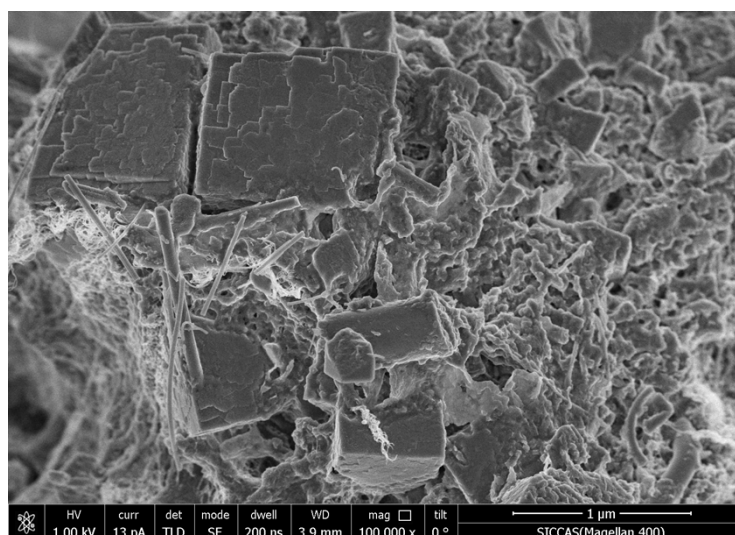

**Figure S2.** SEM image for the NaO<sub>2</sub> particle consisting of stacked thin plates wired by carbon nanotubes.

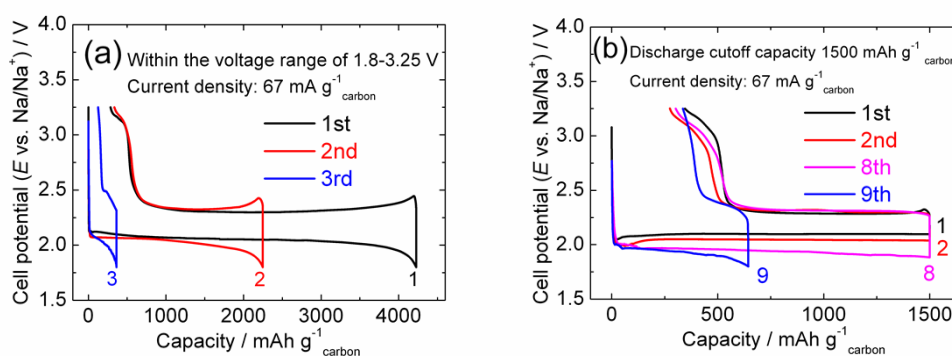

**Figure S3.** Cycleability as a function of discharge depth for the Na-O<sub>2</sub> batteries under the flowing Ar/O<sub>2</sub> (80/20 vol%) atmosphere. (a) Cycling curves for the NaO<sub>2</sub> batteries tested within a voltage range of 1.8-3.25 V. (b) Cycling curves for the NaO<sub>2</sub> batteries tested with a cutoff discharge capacity of 1500 mAh g<sup>-1</sup><sub>carbon</sub> and a cutoff charge voltage of 3.25 V. The current density for all the tests is 67 mA g<sup>-1</sup><sub>carbon</sub>. For the case of full discharge, the capacity decreases drastically during the first three cycles. The released capacity during the 3rd discharge is smaller than 10% of the first discharge capacity. In the case with a cutoff discharge capacity of 1500 mAh g<sup>-1</sup><sub>carbon</sub>, eight cycles without the loss of initial capacity can be maintained. The capacity is approximately 45% of the initial value at the 9th discharge.

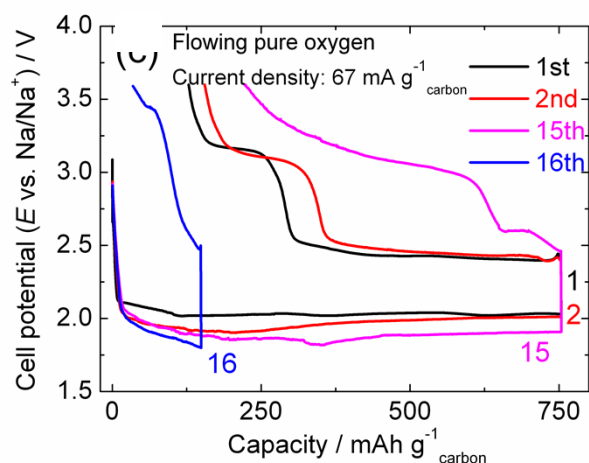

**Figure S4.** Cycleability of the Na-O<sub>2</sub> battery operated in the flowing pure O<sub>2</sub> atmosphere with a cutoff discharge capacity of 750 mAh g<sup>-1</sup><sub>carbon</sub> and a charge voltage of 3.6 V at the current density of 67 mA g<sup>-1</sup><sub>carbon</sub>. Although fifteen cycles without the loss of initial capacity can be observed, the curve profiles are not stable and change a lot especially for the charge process. The capacity fades seriously from the 16th cycle.

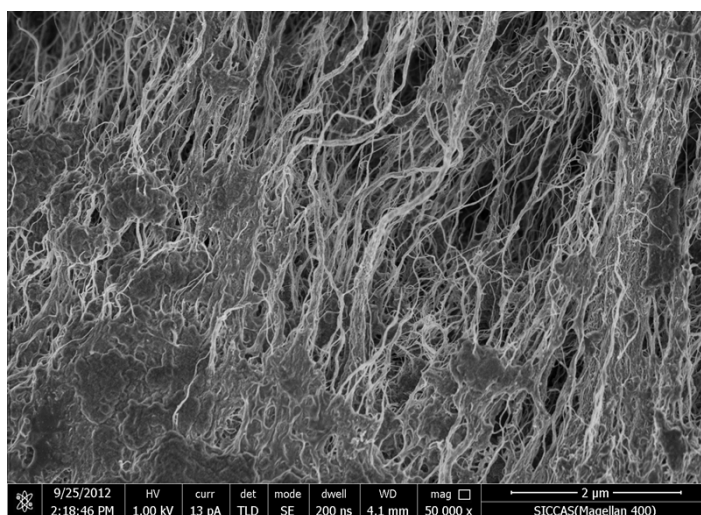

**Figure S5.** Overview SEM image for the VACNTs cathode disassembled from the Na-O<sub>2</sub> battery operated under the flowing pure O<sub>2</sub> atmosphere after full discharge (D, as shown in Figure 2b).

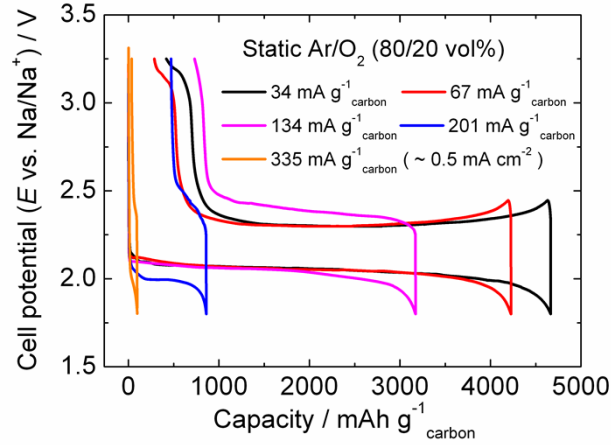

**Figure S6.** Rate performance of the Na-O<sub>2</sub> batteries without a pre-discharge process at low rate in the static Ar/O<sub>2</sub> (80/20 vol%) atmosphere.

### Calculation of the thermodynamic potential based on the reaction

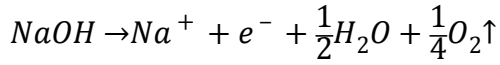

The thermodynamic potential  $E_0$  of the reaction

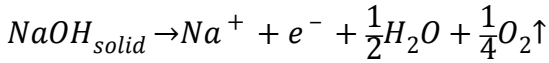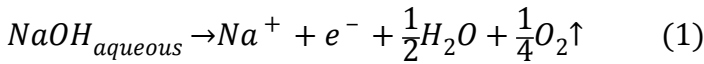

is calculated according to

$$\Delta G_{reaction}^0 = -nFE_0 \quad (2),$$

where  $n$  denotes the number of transferred electrons in the reaction (1),  $F$  is the Faraday constant,

$\Delta G^0$  is the Gibbs energy of the reaction (1) which can be obtained by

$$\Delta G_{reaction}^0 = \sum \Delta G_{f(reactants)}^0 - \sum \Delta G_{f(products)}^0 \quad (3),$$

where  $\sum \Delta G_{f(\text{products})}^0 = \Delta G_{f(\text{Na})}^0 + \frac{1}{2}\Delta G_{f(\text{H}_2\text{O})}^0 + \frac{1}{4}\Delta G_{f(\text{O}_2)}^0 = 0 + (-237.1 \text{ kJ mol}^{-1})/2 + 0 = -118.55$

$\text{kJ mol}^{-1}$ , and  $\sum \Delta G_{f(\text{reactants})}^0 = \Delta G_{f(\text{NaOH}_{\text{solid}})}^0$  or  $\Delta G_{f(\text{NaOH}_{\text{aqueous}})}^0 = -379.4 \text{ kJ/mol}_{\text{solid}}$  or  $-419.20 \text{ kJ/mol}_{\text{aqueous}}$ . Therefore,  $\Delta G_{\text{reaction}}^0$  equates to  $-260.85 \text{ kJ/mol}_{\text{solid}}$  or  $-300.65 \text{ kJ/mol}_{\text{aqueous}}$  and  $E_0 = -\Delta G_{\text{reaction}}^0/nF \approx 2.70 \text{ V}$  (for  $\text{NaOH}_{\text{solid}}$ ) or  $3.12 \text{ V}$  (for  $\text{NaOH}_{\text{aqueous}}$ ).

### Calculations of the thermodynamic potential based on the reaction

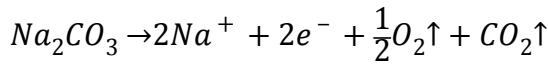

The thermodynamic potential  $E_0$  of the reaction

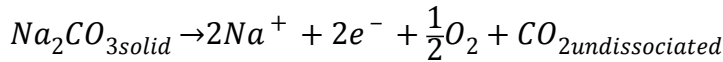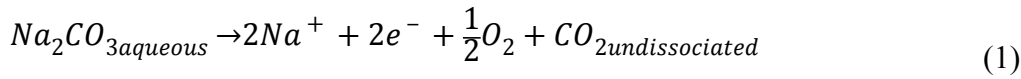

is calculated according to

$$\Delta G_{\text{reaction}}^0 = -nFE_0 \quad (2),$$

where  $n$  denotes to the number of transferred electrons in the reaction (1),  $F$  is the Faraday constant,  $\Delta G^0$  is the Gibbs energy of the reaction (1) which can be obtained by

$$\Delta G_{\text{reaction}}^0 = \sum \Delta G_{f(\text{reactants})}^0 - \sum \Delta G_{f(\text{products})}^0 \quad (3),$$

where  $\sum \Delta G_{f(\text{products})}^0 = 2\Delta G_{f(\text{Na})}^0 + \frac{1}{2}\Delta G_{f(\text{O}_2)}^0 + \Delta G_{f(\text{CO}_2)}^0 = 0 + 0 + (-386.0 \text{ kJ mol}^{-1}) = -386.0 \text{ kJ}$

$\text{mol}^{-1}$ , and  $\sum \Delta G_{f(\text{reactants})}^0 = \Delta G_{f(\text{Na}_2\text{CO}_{3\text{solid}})}^0$  or  $\Delta G_{f(\text{Na}_2\text{CO}_{3\text{aqueous}})}^0 = -1044.4 \text{ kJ/mol}_{\text{solid}}$  or

$-1051.6 \text{ kJ/mol}_{\text{aqueous}}$ . Therefore,  $\Delta G_{\text{reaction}}^0$  equates to  $-658.4 \text{ kJ/mol}_{\text{solid}}$  or

$-665.6 \text{ kJ/mol}_{\text{aqueous}}$  and  $E_0 = -\Delta G_{\text{reaction}}^0/nF \approx 3.41 \text{ V}$  (for  $\text{Na}_2\text{CO}_{3\text{solid}}$ ) or  $3.45 \text{ V}$  (for  $\text{Na}_2\text{CO}_{3\text{aqueous}}$ ).

The thermodynamic data ( $T = 298 \text{ K}$ ) is taken from Lange's Handbook of Chemistry, McGraw-Hill, 16<sup>th</sup> Edition, 2005

### Calculation of the equivalent thickness of $\text{NaO}_2$ pre-deposition layer formed during the pre-discharge process

A pre-discharge at  $67 \text{ mA g}^{-1}_{\text{carbon}}$  for 1 h should yield an initial discharge capacity of  $67 \text{ mAh g}^{-1}_{\text{carbon}}$ . For the carbon mass of  $1.5 \text{ mg cm}^{-2}$  in VACNT cathode, the transferred charge ( $Q_{\text{transfer}}$ ) should be  $0.1 \text{ mAh cm}^{-2}$ .

According to the reaction

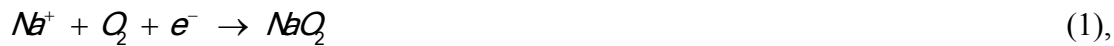

in combination with the Faraday rule we can obtain the relationship

$$\frac{m_{\text{NaO}_2}}{M_{\text{NaO}_2}} = \frac{Q_{\text{transfer}}}{F} \quad (2),$$

where  $m_{\text{NaO}_2}$  is the mass of  $\text{NaO}_2$  (per  $\text{cm}^2$ ) produced by the reaction (1),  $M_{\text{NaO}_2}$  is the relative molar mass of  $\text{NaO}_2$  ( $54.99 \text{ g mol}^{-1}$ ),  $F$  is the Faraday constant ( $96485.3365 \text{ C mol}^{-1}$ ). Thus  $m_{\text{NaO}_2}$  is calculated to be  $0.2 \text{ mg cm}^{-2}$ . According to the theoretical density of  $\text{NaO}_2$  ( $2.20 \text{ g cm}^{-3}$ ), the volume of  $\text{NaO}_2$  per  $\text{cm}^2$  is  $9.1 \times 10^{-5} \text{ cm}^3$ .

It is known that the VACNTs are  $1.5 \text{ mg cm}^{-2}$  in mass with a specific surface area of  $80 \text{ m}^2 \text{ g}^{-1}$ , the VACNTs per  $\text{cm}^2$  should have the surface area of  $1.2 \times 10^3 \text{ cm}^2$

Consequently, the equivalent thickness of the  $\text{NaO}_2$  layer uniformly deposited on VACNT surface is calculated to be  $9.1 \times 10^{-5} \text{ cm}^3 / 1.2 \times 10^3 \text{ cm}^2 = \sim 1 \text{ nm}$ .
